# Supplementary material for: Network topology and parameter estimation: from experimental design methods to gene regulatory network kinetics using a community based approach
Source: PubMed Central journal article supplement (PMC3927870; doi:10.1186/1752-0509-8-13), 2014-02-07
Supplement: 1752-0509-8-13-S2.pdf [file 1752-0509-8-13-S2.pdf]

**A**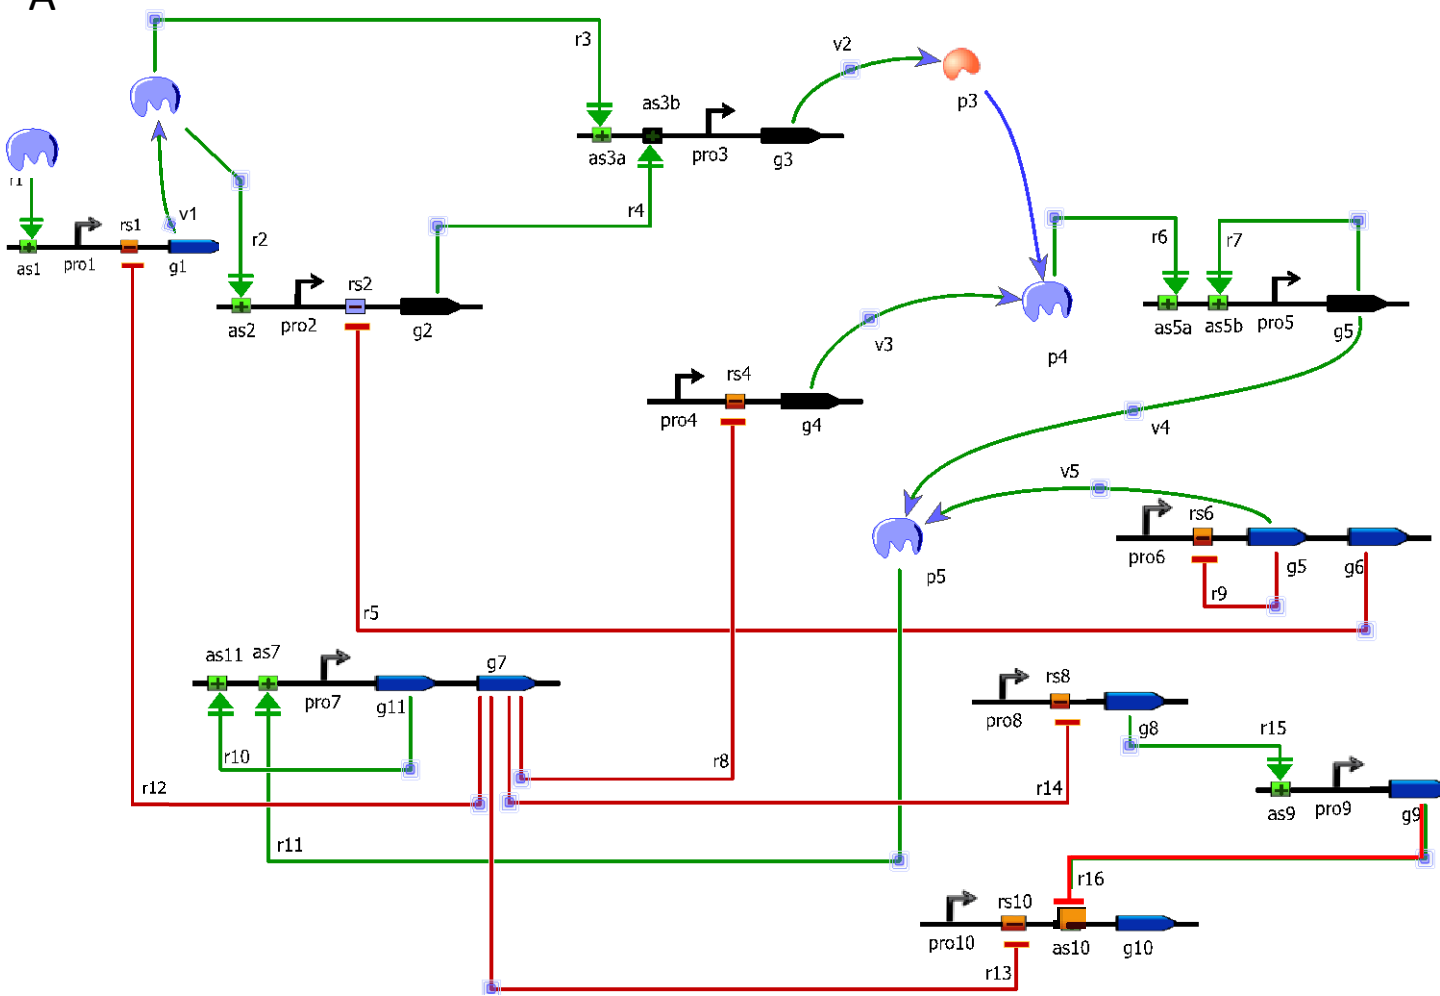**B**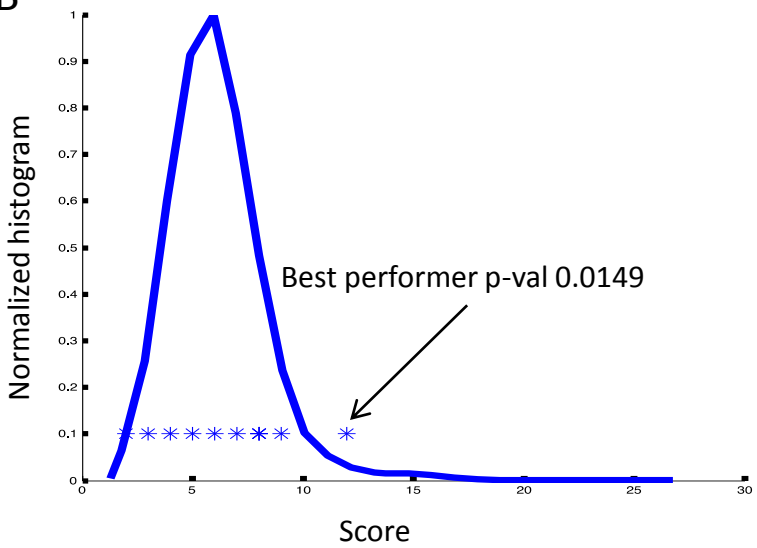

**Figure S2. Network Topology Challenge gene network and scores** **A.** Gene network for model 2 of 11 genes and 61 parameters where links r9,r10,12 were missing and whose identity challenge participants had to Determine.**B.** A score is calculated based on the 3 different links predicted and a p-value is calculated based on the distribution of randomly generated links used as a null-hypothesis.
