# Supplementary material for: Network topology and parameter estimation: from experimental design methods to gene regulatory network kinetics using a community based approach
Source: PubMed Central journal article supplement (PMC3927870; doi:10.1186/1752-0509-8-13), 2014-02-07
Supplement: 1752-0509-8-13-S3.pdf [file 1752-0509-8-13-S3.pdf]

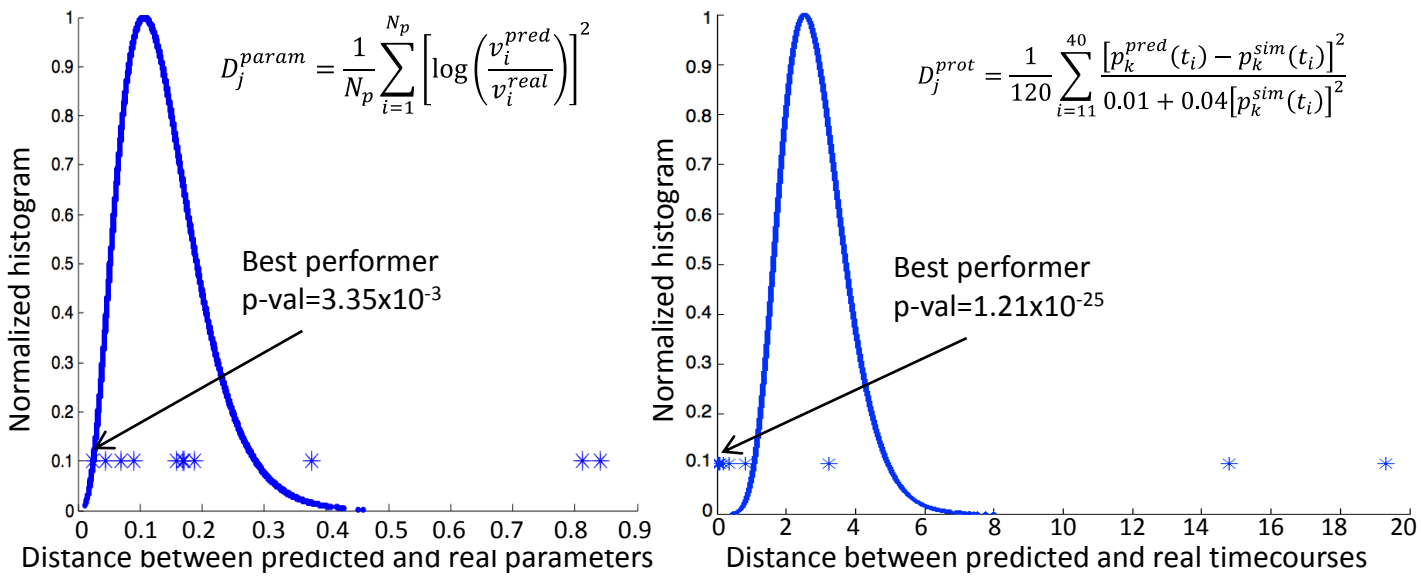

**Figure S1. Score calculation of the Parameter Estimation Challenge**

**A.** A distance as shown by the equation is calculated based on the 45 parameters predicted values and a p-value is calculated when compared to a distribution of randomly generated relative null-hypothesis. **B.** A distance as shown by the equation is calculated based on the predicted protein concentration value for p3, p5 and p8 and a p-value is calculated when compared to a distribution of randomly generated relative null-hypothesis.
