# Supplementary material for: Network topology and parameter estimation: from experimental design methods to gene regulatory network kinetics using a community based approach
Source: PubMed Central journal article supplement (PMC3927870; doi:10.1186/1752-0509-8-13), 2014-02-07
Supplement: 1752-0509-8-13-S4.pdf [file 1752-0509-8-13-S4.pdf]

| Step | Purchased measurements        | Perturbation type | Perturbation target | Experimental technique  | Arguments            | Remaining credits |
|------|-------------------------------|-------------------|---------------------|-------------------------|----------------------|-------------------|
| 1    | array_mod_2_wildtype_high.tab | Wildtype          | -                   | Mass spectrometry       | WT                   | 9600              |
| 2    | p8_p9_mod_2_wildtype.tab      | Wildtype          | -                   | Fluorescence microscopy | WT, High-Res         | 8600              |
| 3    | p3_p4_mod_2_wildtype.tab      | Wildtype          | -                   | Fluorescence microscopy | WT, High-Res         | 8200              |
| 4    | p5_p7_mod:2_wildtype.tab      | Wildtype          | -                   | Fluorescence microscopy | WT, High-Res         | 7800              |
| 5    | p1_p2_mod_2_wildtype.tab      | Wildtype          | -                   | Fluorescence microscopy | WT, High-Res         | 7400              |
| 6    | p10_p11_mod_2_wildtype.tab    | Wildtype          | -                   | Fluorescence microscopy | WT, High-Res, All    | 7000              |
| 7    | array_mod_2_del_p7_high.tab   | Deletion          | p7                  | Mass spectrometry       | Range, High-Res, All | 5200              |
| 8    | array_mod_2_over_p4_high.tab  | Over-expression   | p4                  | Mass spectrometry       | Range, High-Res, All | 3850              |
| 9    | array_mod_2_over_p8_high.tab  | Over-expression   | p8                  | Mass spectrometry       | Range, High-Res, All | 2500              |
| 10   | array_mod_2_over_p11_high.tab | Over-expression   | p11                 | Mass spectrometry       | Range, High-Res, All | 1150              |
| 11   | array_mod_2_dwn_p7_low.tab    | Knockdown         | p7                  | Mass spectrometry       | Range, All, Budget   | 250               |

**Table S1. Summary of the experimental design considerations of team crux for the network inference challenge.** The second column denotes the chosen experimental conditions in the notation used during the challenge. The arguments underlying our decisions are denoted by abbreviations. Wild-type measurements provide data for quite less credits (argument “WT”). Such measurements have been chosen initially to obtain a setting with a reasonable set of identifiable parameters. Data with high resolution over time (argument „High-Res“) provides more detailed information about the dynamics and was therefore expected to be more efficient for distinguishing potentially missing links with similar qualitative effects. Using a measurement technique providing data for all compounds (argument „All“) is advantageous to obtain a comprehensive overview of the effect of a perturbation. The argument abbreviated by „Range“ indicates the fact that missing links are only identifiable, if the concentration range of the regulator is not far from the respective Michaelis constant  $k_D$ . Therefore, we performed perturbations affecting the concentration range of potential regulators in a desired direction. Finally, we had to account the remaining credits indicated by the argument „Budget“.
