# Supplementary material for: Network topology and parameter estimation: from experimental design methods to gene regulatory network kinetics using a community based approach
Source: PubMed Central journal article supplement (PMC3927870; doi:10.1186/1752-0509-8-13), 2014-02-07
Supplement: 1752-0509-8-13-S5.pdf [file 1752-0509-8-13-S5.pdf]

| Source gene | (+/-)    | Destination gene | (+/-)    | Destination gene | Value of $N_i$ |
|-------------|----------|------------------|----------|------------------|----------------|
| <i>i</i>    | <i>i</i> | <i>i</i>         | <i>i</i> | <i>i</i>         | 0              |
| <i>c</i>    | <i>i</i> | <i>i</i>         | <i>i</i> | <i>i</i>         | 1              |
| <i>i</i>    | <i>c</i> | <i>i</i>         | <i>i</i> | <i>i</i>         | 0              |
| <i>i</i>    | <i>i</i> | <i>c</i>         | <i>i</i> | <i>i</i>         | 1              |
| <i>i</i>    | <i>i</i> | <i>i</i>         | <i>c</i> | <i>i</i>         | 0              |
| <i>i</i>    | <i>i</i> | <i>i</i>         | <i>i</i> | <i>c</i>         | 1              |
| <i>i</i>    | <i>i</i> | <i>i</i>         | <i>c</i> | <i>c</i>         | 2              |
| <i>i</i>    | <i>c</i> | <i>c</i>         | <i>i</i> | <i>i</i>         | 2              |
| <i>c</i>    | <i>i</i> | <i>c</i>         | <i>i</i> | <i>i</i>         | 2              |
| <i>c</i>    | <i>i</i> | <i>i</i>         | <i>i</i> | <i>c</i>         | 2              |
| <i>c</i>    | <i>i</i> | <i>c</i>         | <i>i</i> | <i>c</i>         | 3              |
| <i>c</i>    | <i>i</i> | <i>i</i>         | <i>c</i> | <i>c</i>         | 3              |
| <i>c</i>    | <i>c</i> | <i>c</i>         | <i>i</i> | <i>i</i>         | 3              |
| <i>c</i>    | <i>c</i> | <i>c</i>         | <i>i</i> | <i>c</i>         | 4              |
| <i>c</i>    | <i>i</i> | <i>c</i>         | <i>c</i> | <i>c</i>         | 4              |

**Table S2 Table used to score the submitted links for Network Topology challenge**

A link is defined by a source and a destination gene, and a source gene may or may not have two destination genes. Each row on the table represents a possible link submission.  $N_i$  represents the number of points given for the submitted link, where *i* stands for incorrect and *c* a correct prediction of the source and destination gene. Note that correct (+/-) predictions without the correct gene give no points.
